# Supplementary material for: Toxicity Assessments of Near-infrared Upconversion Luminescent LaF3:Yb,Er in Early Development of Zebrafish Embryos
Source: PubMed Central journal article supplement — Theranostics. 2013 Mar 20;3(4):258–66. doi: 10.7150/thno.5701 (PMC3630526; doi:10.7150/thno.5701), 2013-03-20
Supplement: thnov03p0258s1.pdf [file thnov03p0258s1.pdf]

## ***Supplementary data***

In this study, UCNPs were injected in the zebrafish Embryos and subsequently imaged in the digestive system of the zebrafish. Upon excitation at 980 nm, the distribution of the nanoparticles in the zebrafish can be clearly visualized. Figure S1, which of the upconversion emission had been included in this manuscript as supporting data.

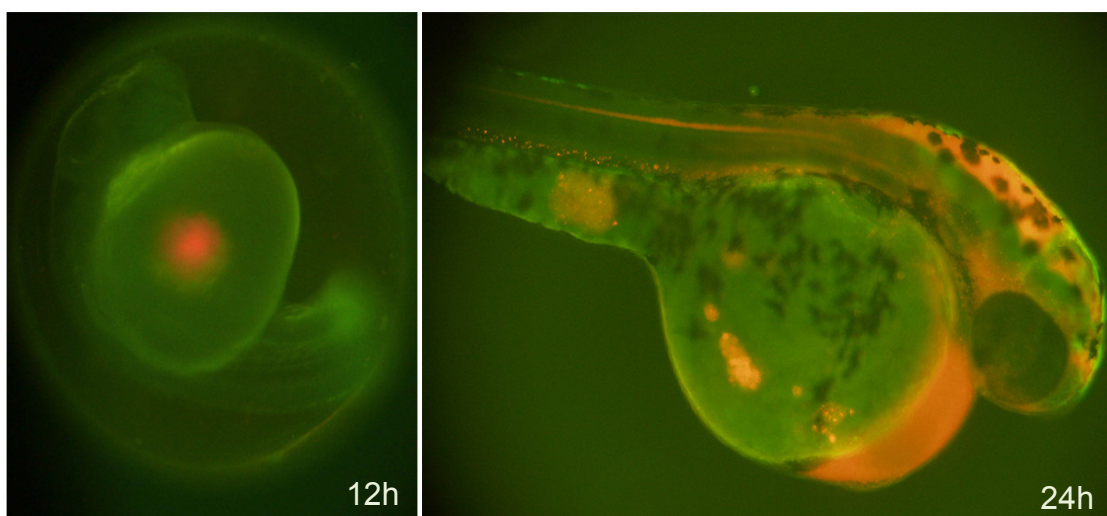

Fig.S1. In *vivo* organism and zebrafish embryos imaging with UC nanoparticles: images of zebrafish embryos after being injection over various periods of time: the green color represents the brightfield and red for the UC emission.
